# Supplementary material for: The correlation of EZH2 expression with the progression and prognosis of hepatocellular carcinoma
Source: Springer Nature journal article supplement (doi:10.1186/s12865-022-00502-7), 2022-06-04

**Supplementary Figure 1** Correlation of EZH2 expression with immune infiltration level in different tumor types via TIMER database.

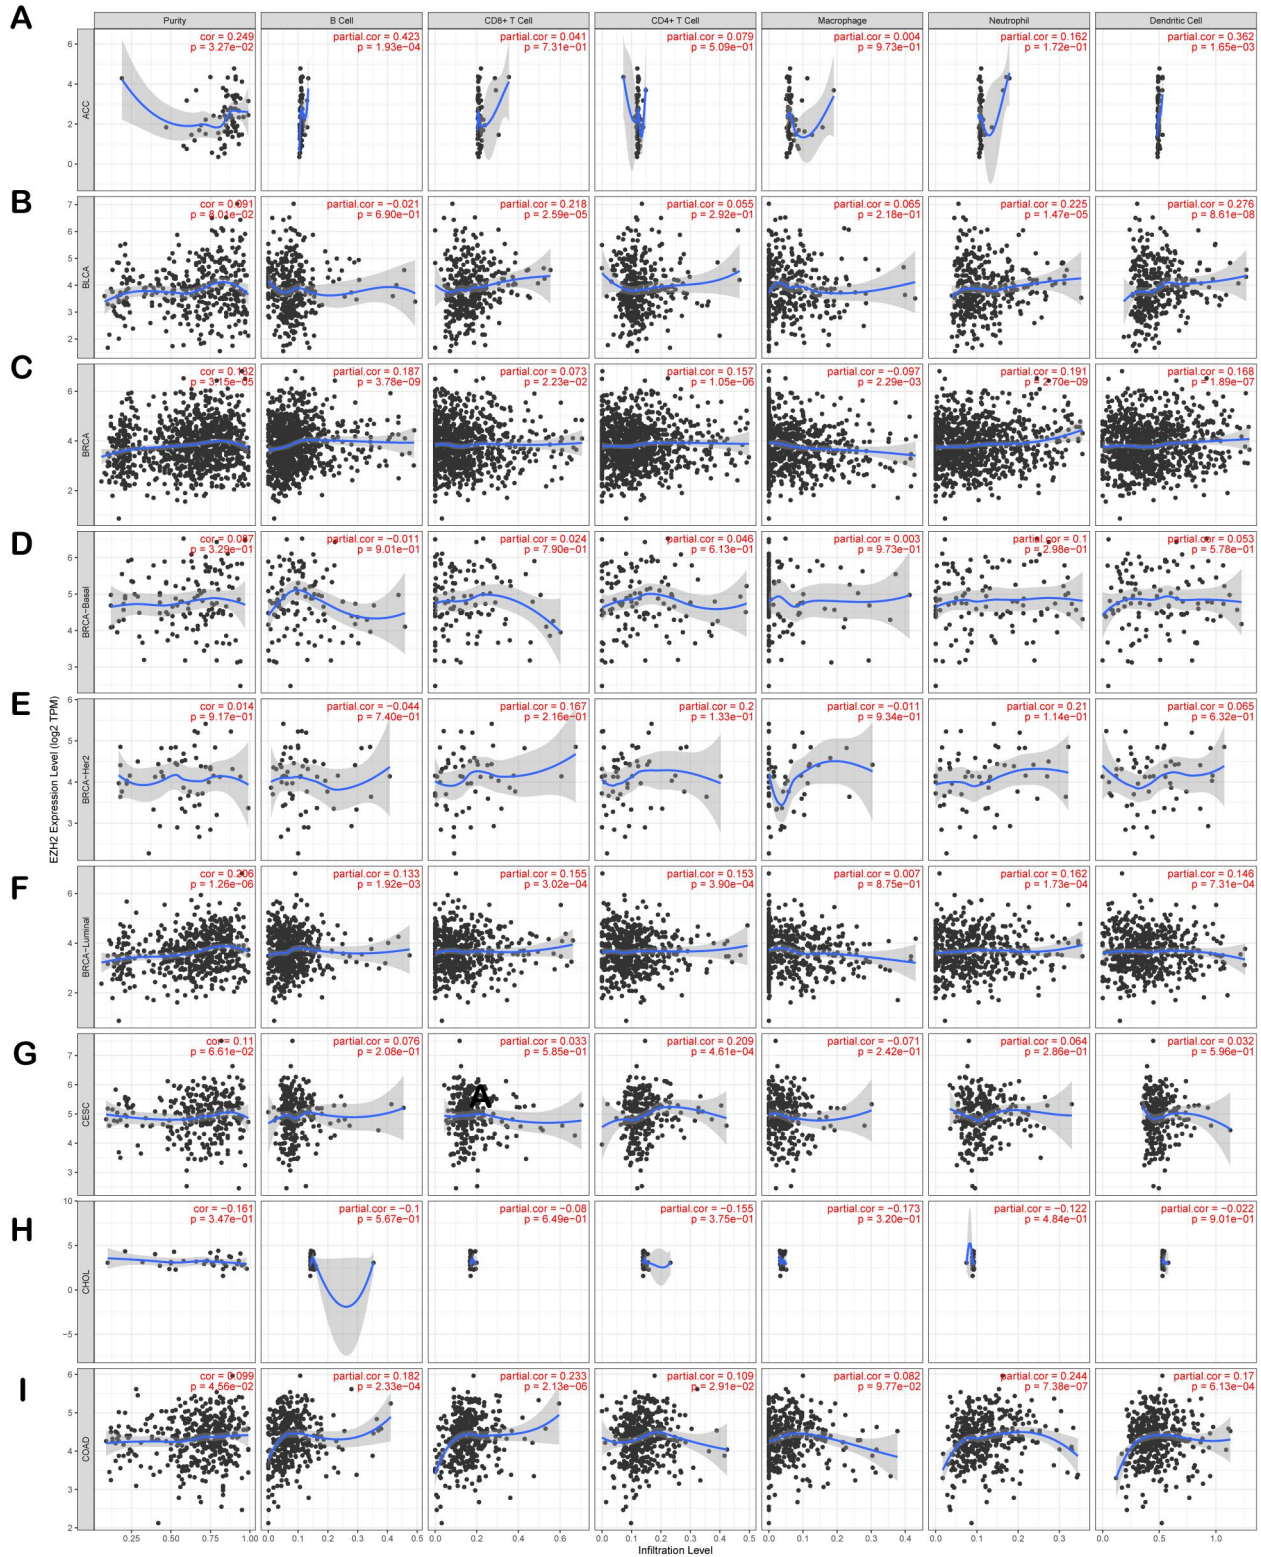

**J**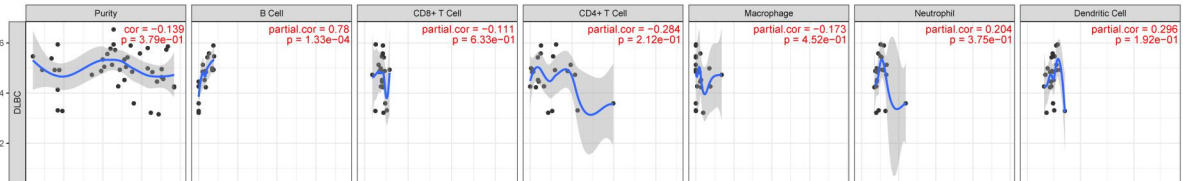**K**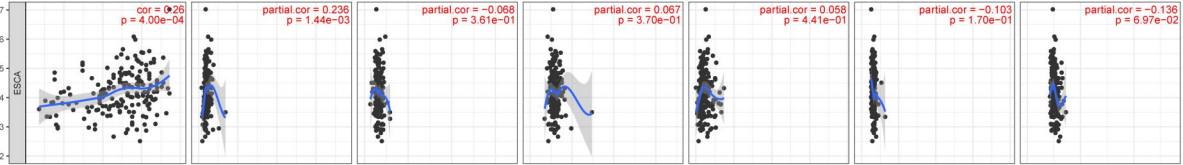**L**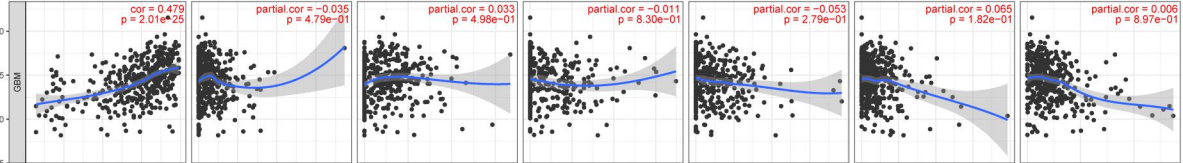**M**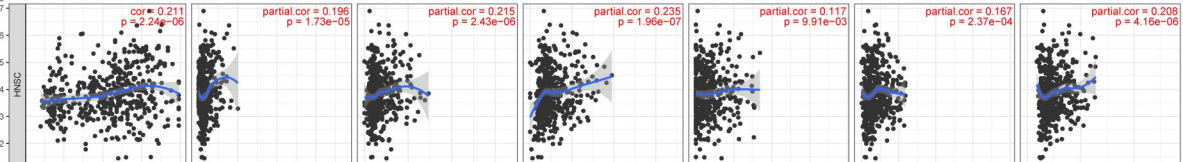**N**

EZH2 Expression Level (log2 TPM)

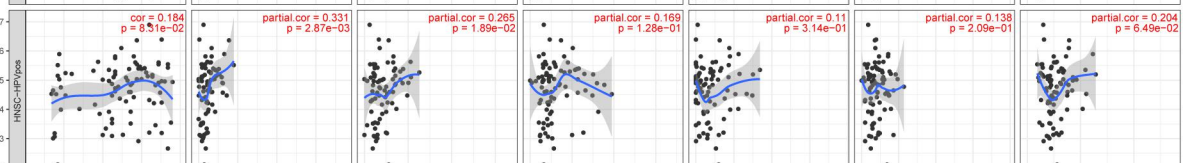**O**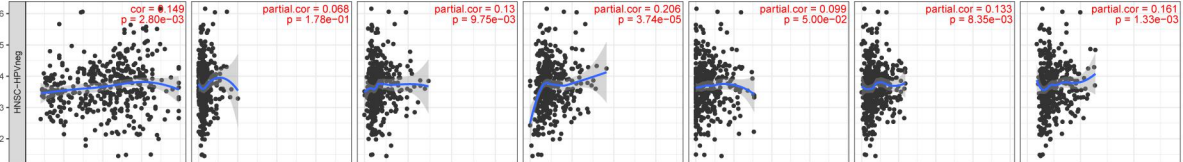**P**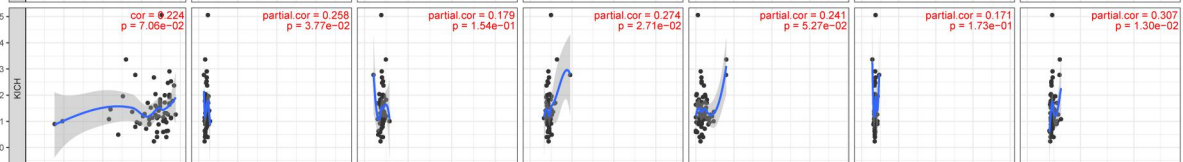**Q**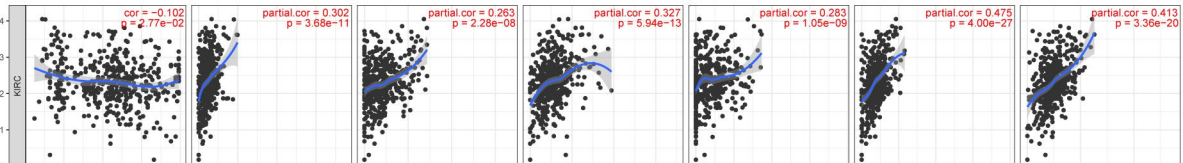**R**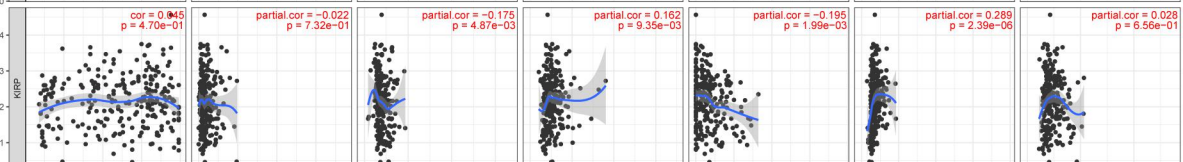

Infiltration Level

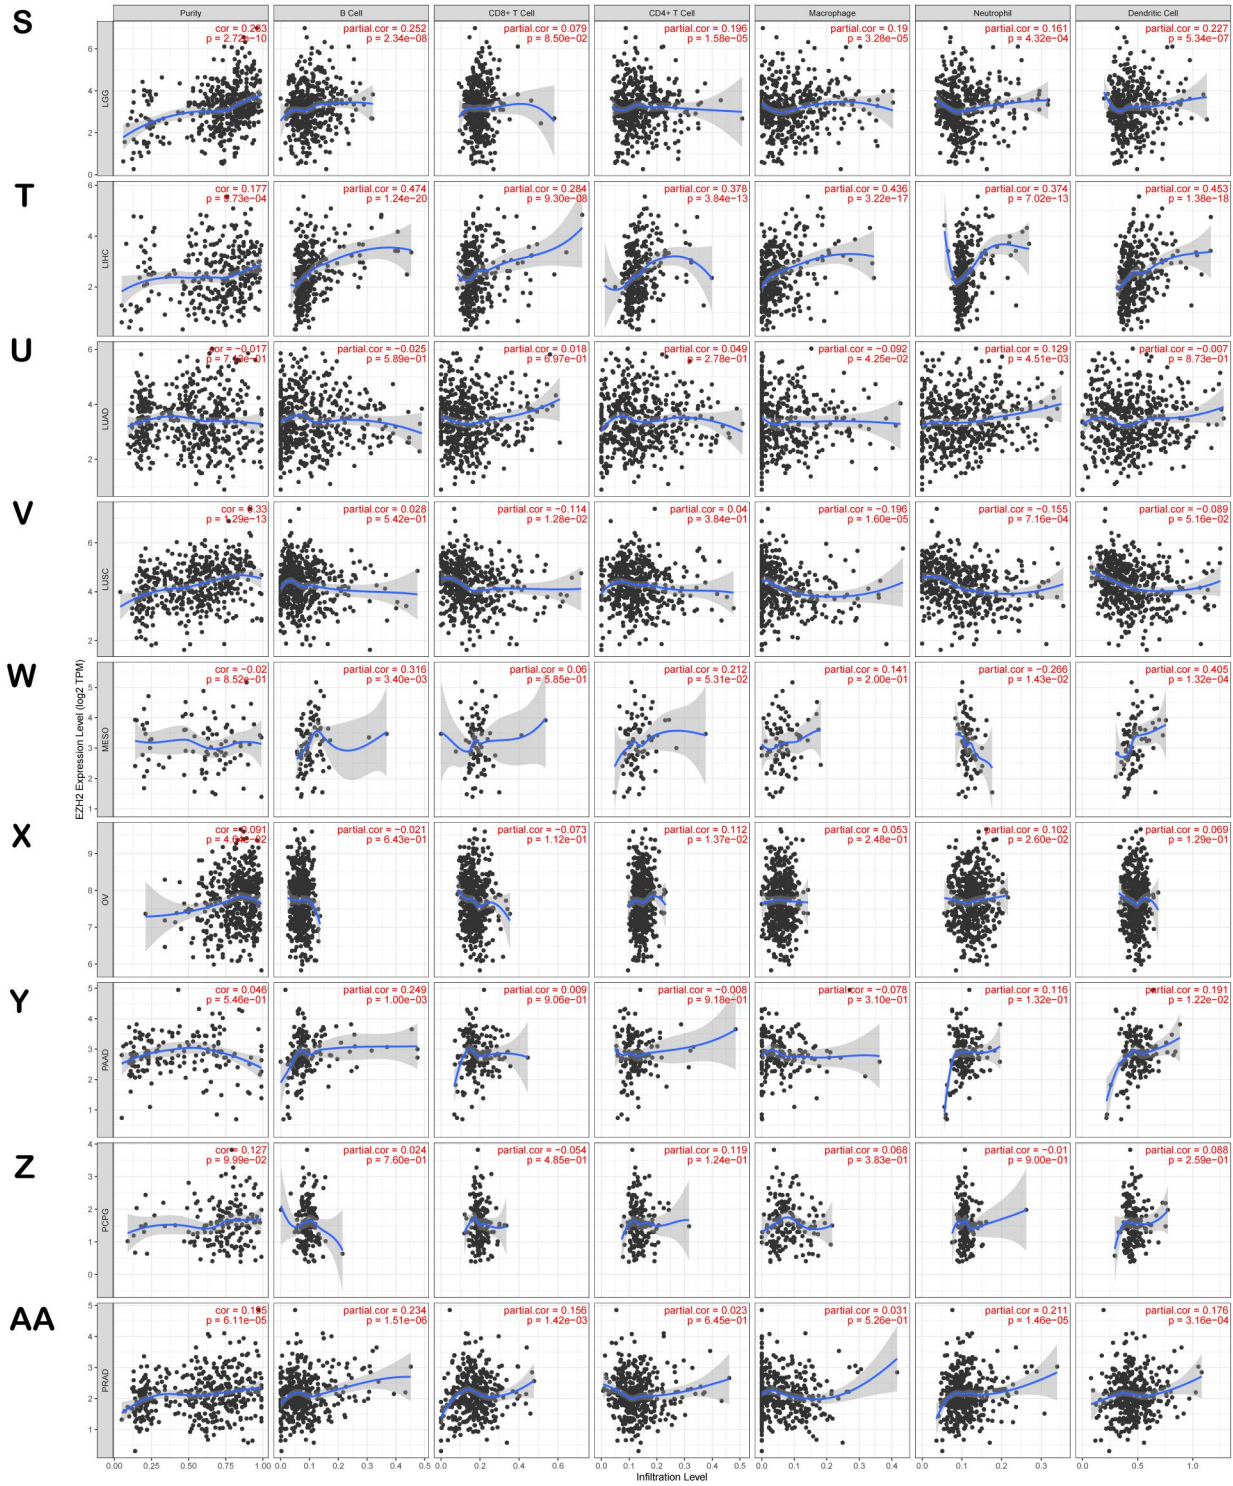

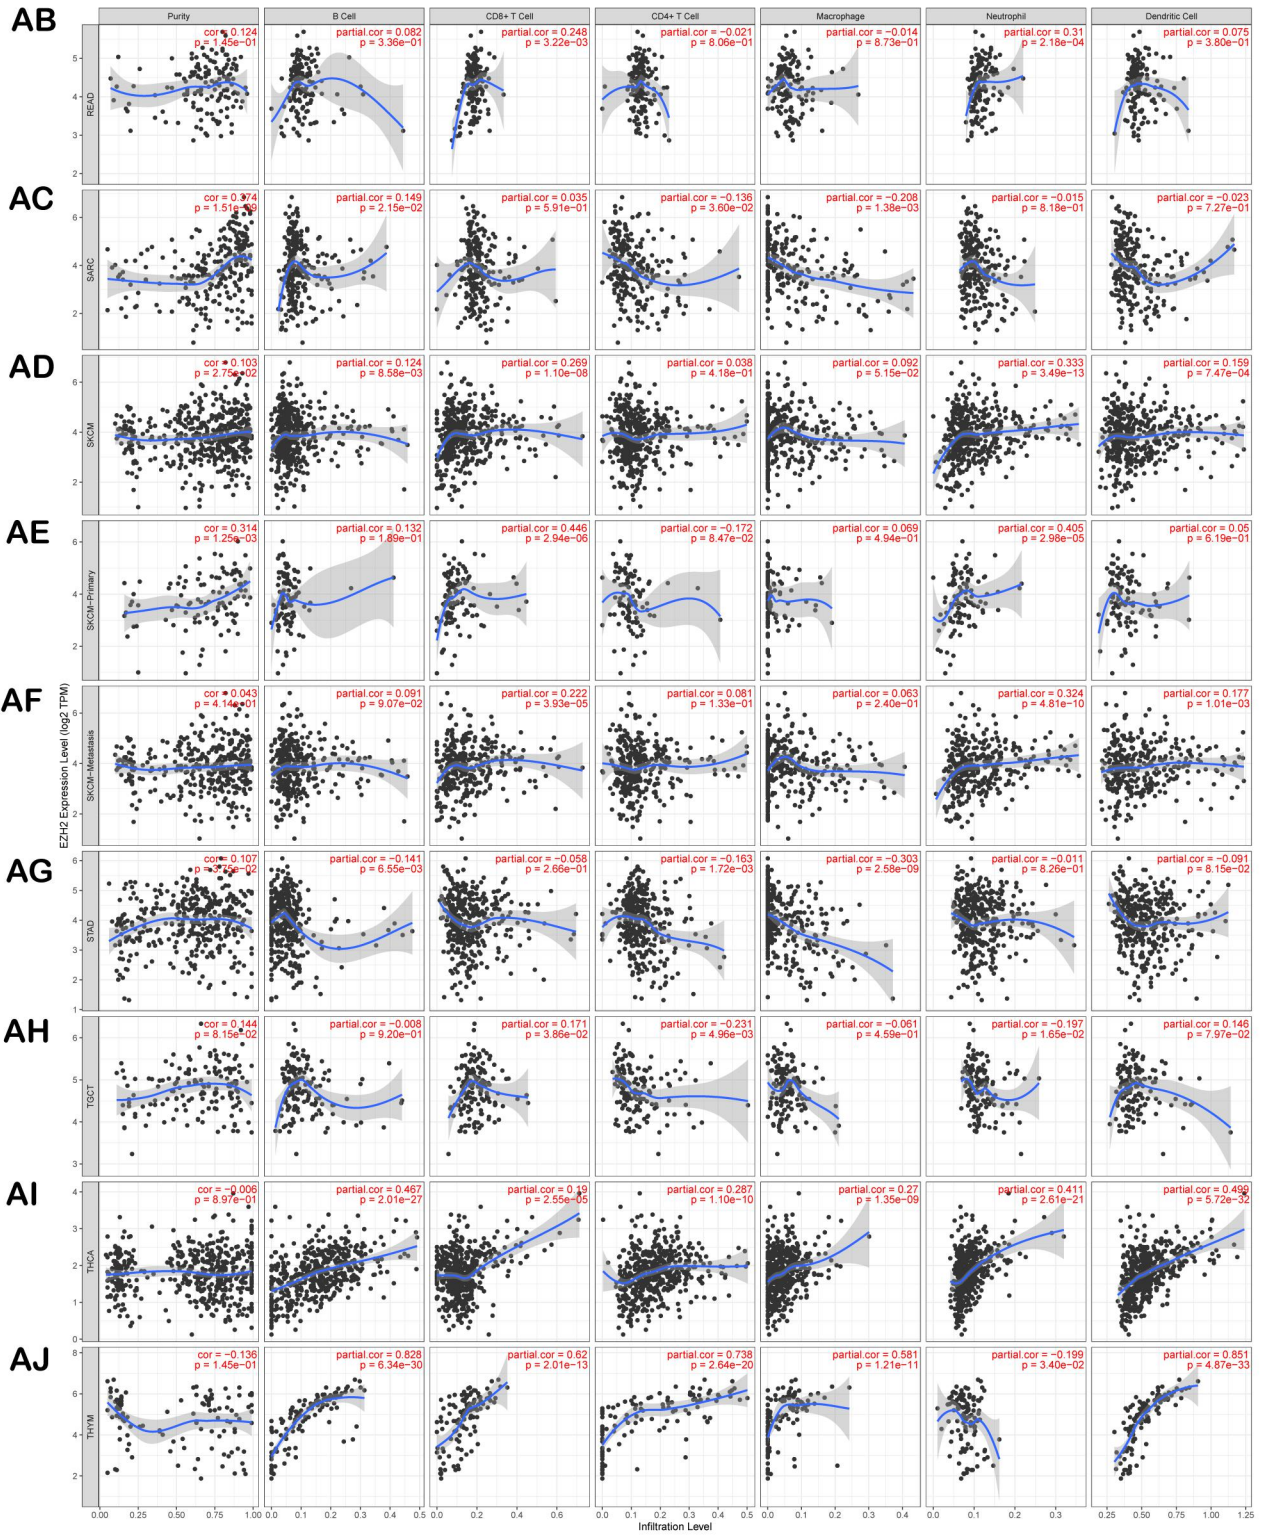

AK

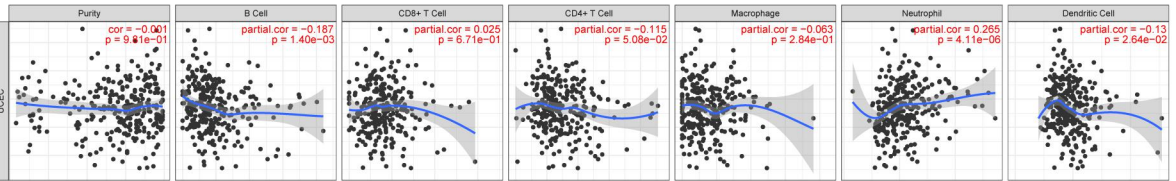

AL

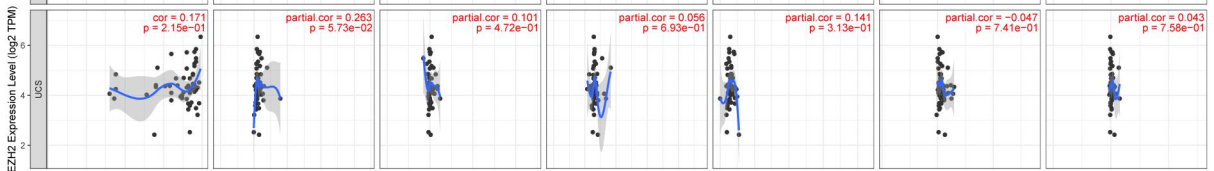

AM

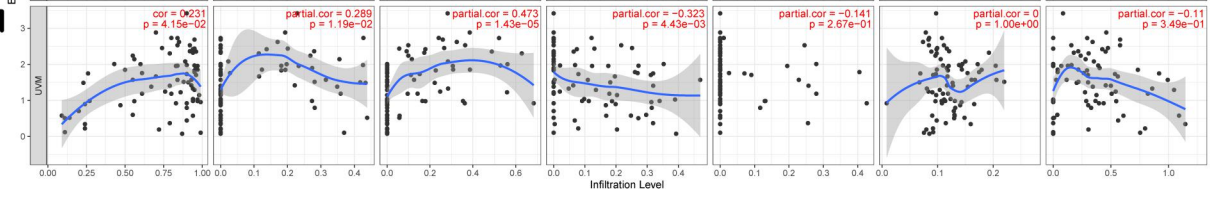

Supplement: MOESM1 [file 23128076]
