# Supplementary material for: The correlation of EZH2 expression with the progression and prognosis of hepatocellular carcinoma
Source: PubMed Central journal article supplement (PMC9166340; doi:10.1186/s12865-022-00502-7), 2022-06-04
Supplement: 12865_2022_502_MOESM2_ESM.pdf [file 12865_2022_502_MOESM2_ESM.pdf]

**Supplementary Table 1.** EZH2 expression in cancers versus normal tissue in oncomine database.

| Cancer               | Cancer type                                    | P-value                            | Fold change | Rank (%) | Sample | Reference (PMID) |
|----------------------|------------------------------------------------|------------------------------------|-------------|----------|--------|------------------|
| Bladder cancer       | Infiltrating Bladder Urothelial Carcinoma      | 1.55E-16                           | 5.294       | 1%       | 157    | 16432078         |
|                      | Infiltrating Bladder Urothelial Carcinoma      | 4.14E-5                            | 2.110       | 9%       | 60     | 15173019         |
| Brain and CNS cancer | Brain Glioblastoma                             | 2.80E-38                           | 9.853       | 1%       | 557    | TCGA             |
|                      | Anaplastic Astrocytoma                         | 9.74E-14                           | 5.854       | 1%       | 180    | 16616334         |
|                      | Oligodendroglioma                              | 2.59E-13                           | 4.474       | 1%       | 180    | 16616334         |
|                      | Glioblastoma                                   | 3.03E-18                           | 7.432       | 2%       | 180    | 16616334         |
|                      | Anaplastic Oligodendroglioma                   | 3.08E-11                           | 5.491       | 1%       | 33     | 16357140         |
|                      | Glioblastoma                                   | 1.64E-8                            | 10.372      | 3%       | 84     | 18565887         |
| Breast cancer        | Medullary Breast Carcinoma                     | 7.14E-16                           | 2.848       | 1%       | 2136   | 22522925         |
|                      | Invasive Breast Carcinoma                      | 2.54E-29                           | 3.797       | 1%       | 593    | TCGA             |
|                      | Invasive Lobular Breast Carcinoma              | 9.65E-17                           | 3.173       | 1%       | 593    | TCGA             |
|                      | Male Breast Carcinoma                          | 3.11E-11                           | 2.085       | 1%       | 593    | TCGA             |
|                      | Invasive Ductal Breast Carcinoma               | 1.90E-40                           | 4.501       | 1%       | 593    | TCGA             |
|                      | Mixed Lobular and Ductal Breast Carcinoma      | 1.17E-5                            | 2.241       | 2%       | 593    | TCGA             |
|                      | Invasive Ductal and Lobular Carcinoma          | 7.46E-5                            | 4.140       | 4%       | 593    | TCGA             |
|                      | Ductal Breast Carcinoma                        | 2.30E-8                            | 8.874       | 2%       | 47     | 16473279         |
| Cervical cancer      | Cervical Squamous Cell Carcinoma Epithelia     | 3.42E-9                            | 2.649       | 1%       | 41     | 17974957         |
|                      | Cervical Squamous Cell Carcinoma               | 6.27E-11                           | 3.552       | 1%       | 66     | 18506748         |
|                      | Cervical Cancer                                | 1.02E-10                           | 2.837       | 1%       | 123    | 17640062         |
| Colorectal cancer    | Colon Adenoma                                  | 1.46E-22                           | 3.631       | 4%       | 64     | 18171984         |
|                      | Cecum Adenocarcinoma                           | 2.17E-13                           | 2.249       | 2%       | 237    | TCGA             |
|                      | Rectal Mucinous Adenocarcinoma                 | 2.22E-6                            | 2.283       | 2%       | 237    | TCGA             |
|                      | Colon Mucinous Adenocarcinoma                  | 4.74E-11                           | 2.089       | 3%       | 237    | TCGA             |
|                      | Rectal Adenocarcinoma                          | 3.69E-16                           | 2.247       | 5%       | 237    | TCGA             |
|                      | Colon Adenocarcinoma                           | 4.09E-16                           | 2.349       | 5%       | 237    | TCGA             |
|                      | Rectal Adenoma                                 | 1.76E-6                            | 2.607       | 4%       | 64     | 18171984         |
|                      | Colon Adenoma                                  | 5.36E-10                           | 2.154       | 8%       | 64     | 18171984         |
|                      | Colon Adenoma                                  | 1.98E-6                            | 2.821       | 4%       | 40     | 20957034         |
|                      | Colon Carcinoma                                | 6.78E-7                            | 2.742       | 8%       | 40     | 20957034         |
|                      | Colorectal Carcinoma                           | 1.28E-9                            | 2.163       | 6%       | 82     | 20143136         |
|                      | Colorectal Carcinoma                           | 1.04E-6                            | 2.201       | 8%       | 105    | 20957034         |
|                      | Esophageal cancer                              | Esophageal Squamous Cell Carcinoma | 3.77E-6     | 2.098    | 5%     | 34               |
| Gastric cancer       | Gastric Intestinal Type Adenocarcinoma         | 1.89E-10                           | 2.506       | 3%       | 69     | 19081245         |
| Head and neck cancer | Nasopharyngeal Carcinoma                       | 1.38E-5                            | 2.802       | 4%       | 41     | 16912175         |
| Kidney Cancer        | Renal Pelvis Urothelial Carcinoma              | 1.02E-17                           | 6.766       | 1%       | 92     | 16115910         |
|                      | Hereditary Clear Cell Renal Cell Carcinoma     | 1.85E-14                           | 2.527       | 1%       | 70     | 19470766         |
|                      | Non-Hereditary Clear Cell Renal Cell Carcinoma | 9.48E-10                           | 2.557       | 2%       | 70     | 19470766         |

|                                |                                   |                                  |         |       |     |          |
|--------------------------------|-----------------------------------|----------------------------------|---------|-------|-----|----------|
| Liver cancer                   | Hepatocellular Carcinoma          | 1.52E-68                         | 3.420   | 2%    | 445 | 21159642 |
|                                | Hepatocellular Carcinoma          | 6.33E-9                          | 3.296   | 2%    | 43  | 21159642 |
|                                | Hepatocellular Carcinoma          | 9.41E-7                          | 5.621   | 3%    | 75  | 17393520 |
| Lung cancer                    | Small Cell Lung Carcinoma         | 6.01E-9                          | 20.627  | 1%    | 203 | 11707567 |
|                                | Squamous Cell Lung Carcinoma      | 6.43E-8                          | 16.342  | 1%    | 203 | 11707567 |
|                                | Lung Adenocarcinoma               | 1.29E-8                          | 3.578   | 1%    | 66  | 17540040 |
|                                | Squamous Cell Lung Carcinoma      | 4.45E-16                         | 6.474   | 2%    | 156 | 20421987 |
|                                | Lung Adenocarcinoma               | 2.29E-13                         | 3.189   | 2%    | 156 | 20421987 |
|                                | Large Cell Lung Carcinoma         | 1.65E-6                          | 6.418   | 5%    | 156 | 20421987 |
|                                | Lung Adenocarcinoma               | 6.52E-7                          | 2.554   | 3%    | 39  | 16314486 |
|                                | Lung Adenocarcinoma               | 3.15E-12                         | 2.017   | 5%    | 107 | 18297132 |
|                                | Lung Adenocarcinoma               | 9.19E-13                         | 2.223   | 4%    | 246 | 22080568 |
|                                | Other cancer                      | Vulvar Intraepithelial Neoplasia | 1.74E-9 | 4.626 | 1%  | 19       |
| Adrenal Cortex Carcinoma       |                                   | 1.76E-5                          | 4.733   | 1%    | 19  | 12547710 |
| Pleural Malignant Mesothelioma |                                   | 1.03E-5                          | 3.522   | 3%    | 54  | 15920167 |
| Malignant Fibrous Histiocytoma |                                   | 1.60E-5                          | 6.966   | 3%    | 54  | 15994966 |
| Skin Squamous Cell Carcinoma   |                                   | 8.97E-5                          | 2.112   | 4%    | 87  | 18442402 |
| Ovarian cancer                 | Ovarian Serous Adenocarcinoma     | 4.15E-7                          | 5.867   | 4%    | 53  | 1948012  |
|                                | Ovarian Serous Cystadenocarcinoma | 1.44E-6                          | 6.584   | 5%    | 594 | TCGA     |
| Pancreatic cancer              | Pancreatic Carcinoma              | 4.78E-7                          | 2.313   | 3%    | 52  | 19732725 |
| Prostate cancer                | Prostate Carcinoma                | 3.94E-5                          | 2.241   | 1%    | 19  | 16286247 |
| Sarcoma                        | Pleomorphic Liposarcoma           | 1.11E-7                          | 10.983  | 1%    | 54  | 15994966 |
|                                | Round Cell Liposarcoma            | 2.52E-7                          | 14.690  | 1%    | 54  | 15994966 |
|                                | Leiomyosarcoma                    | 3.30E-7                          | 14.336  | 1%    | 54  | 15994966 |
|                                | Synovial Sarcoma                  | 8.38E-7                          | 7.922   | 1%    | 54  | 15994966 |
|                                | Fibrosarcoma                      | 1.93E-6                          | 9.074   | 1%    | 54  | 15994966 |
|                                | Malignant Fibrous Histiocytoma    | 1.60E-5                          | 6.966   | 3%    | 54  | 15994966 |
|                                | Dedifferentiated Liposarcoma      | 4.24E-17                         | 2.475   | 1%    | 158 | 20601955 |
|                                | Pleomorphic Liposarcoma           | 2.38E-11                         | 4.489   | 1%    | 158 | 20601955 |
|                                | Myxoid/Round Cell Liposarcoma     | 2.88E-11                         | 4.892   | 1%    | 158 | 20601955 |
|                                | Myxofibrosarcoma                  | 1.42E-13                         | 3.756   | 1%    | 158 | 20601955 |
|                                | Leiomyosarcoma                    | 2.04E-11                         | 4.979   | 2%    | 158 | 20601955 |

---
